# Supplementary material for: Real-time structural motif searching in proteins using an inverted index strategy
Source: bioRxiv or medRxiv preprint supplement (doi:10.1101/2020.09.11.293977), 2020-09-12

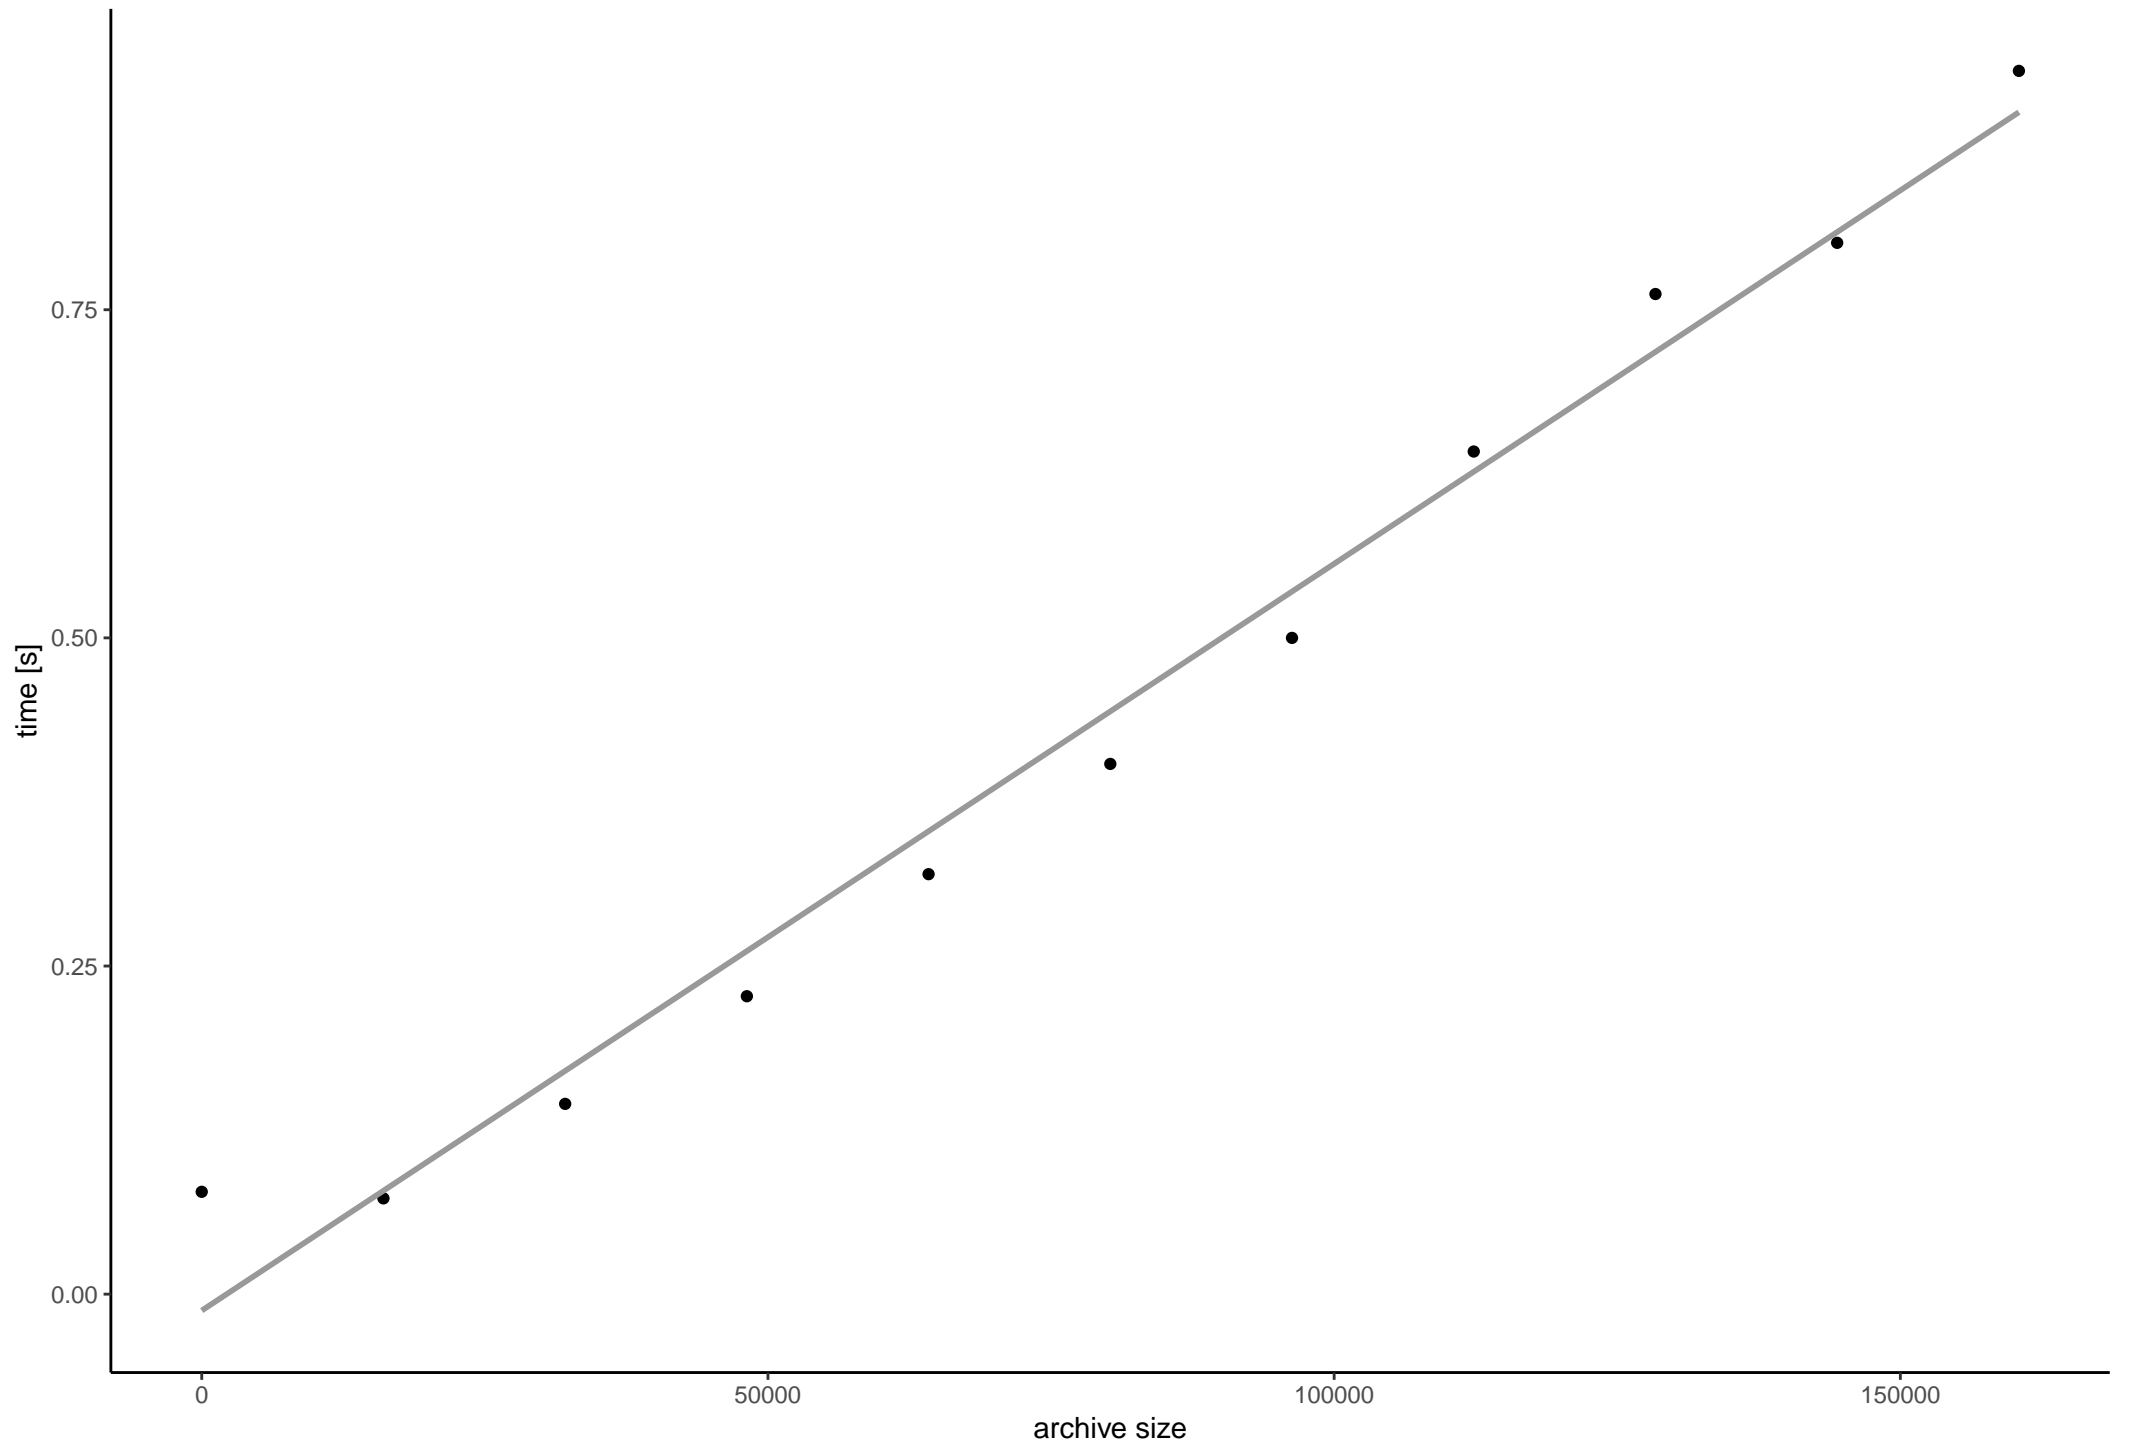

Supplement: Supplementary file [file media-1.pdf]
