# Supplementary material for: Real-time structural motif searching in proteins using an inverted index strategy
Source: bioRxiv or medRxiv preprint supplement (doi:10.1101/2020.09.11.293977), 2020-09-12

Cys:F-207/A-12

His:F-229/A-32

His:F-225/A-28

Cys:F-212/A-15

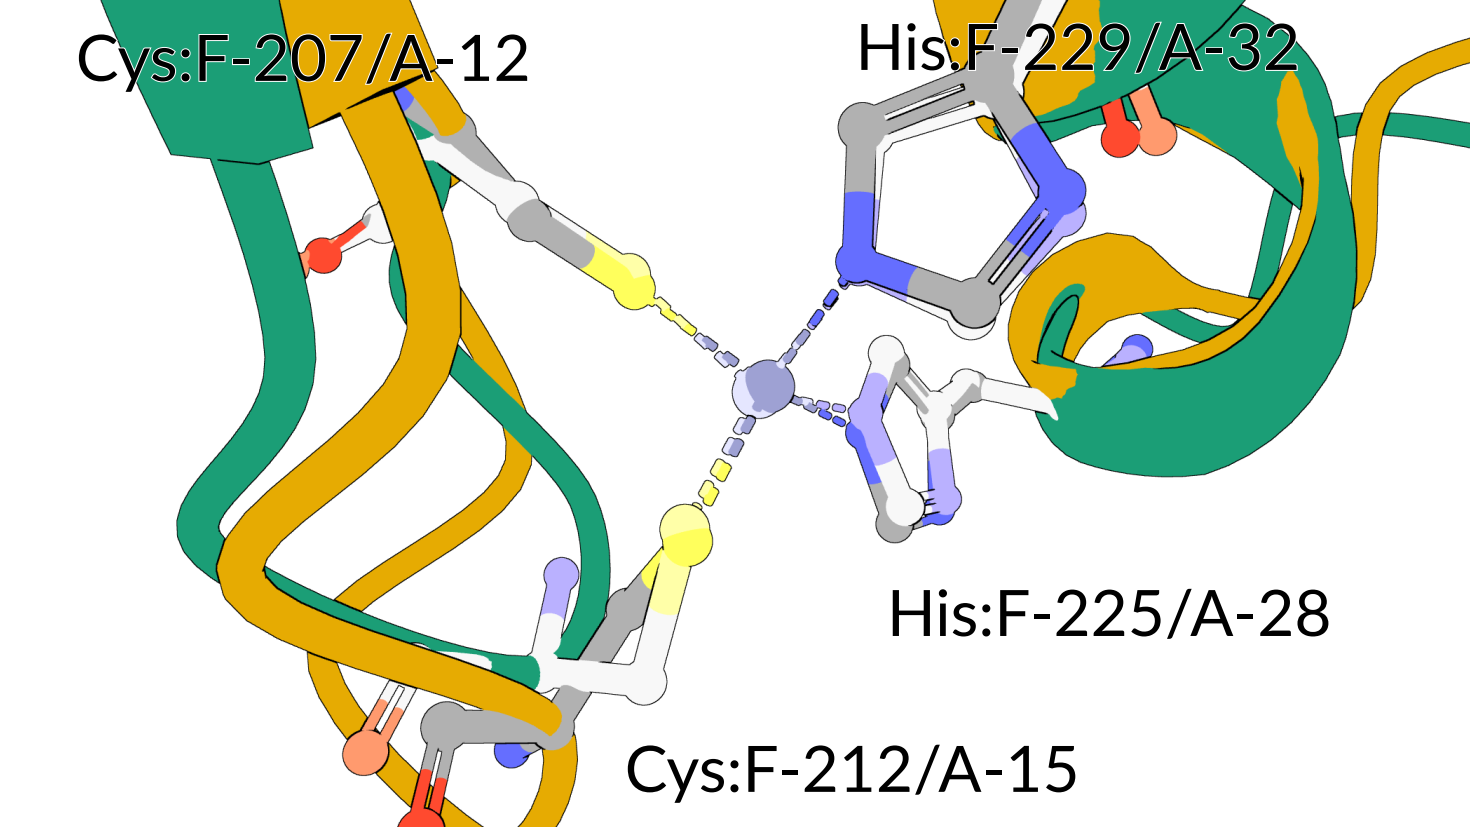

Supplement: Supplementary file [file media-3.pdf]
